# Supplementary material for: Predictive value of long-term changes of growth differentiation factor-15 over a 27-year-period for heart failure and death due to coronary heart disease
Source: PubMed Central journal article supplement (PMC5957420; doi:10.1371/journal.pone.0197497), 2018-05-17
Supplement: pone.0197497.s002.pdf [file pone.0197497.s002.pdf]

**S1 Table. Baseline characteristics of the DAN-MONICA cohort according to round 1-3 (Data for the nonimputed datasets).**

|                                                        | <b>round 1</b>      | <b>round 2</b>      | <b>round 3</b>       |
|--------------------------------------------------------|---------------------|---------------------|----------------------|
|                                                        | <b>(n=3785)</b>     | <b>(n=2987)</b>     | <b>(n=2656)</b>      |
| <b>Examination age (years)</b>                         | 45.5±11             | 50.4±11             | 55.4±10.8            |
| <b>Male (%)</b>                                        | 1940 (51.3)         | 1524 (51)           | 1289 (50.5)          |
| <b>BMI (kg/m<sup>2</sup>)</b>                          | 24.6±3.9            | 25.1±4              | 25.8±4.2             |
| <b>BMI&gt;25 kg/m<sup>2</sup> No. (%)</b>              | 1524 (40.3)         | 1360 (45.5)         | 1343 (52.6)          |
| <b>HDL cholesterol (mmol/L)</b>                        | 1.5±0.4             | 1.5±0.4             | 1.4±0.4              |
| <b>LDL cholesterol (mmol/L)</b>                        | 3.7±1.1             | 4±1.1               | 4.1±1                |
| <b>Total cholesterol (mmol/L)</b>                      | 5.8±1.2             | 6.1±1.2             | 6.2±1.1              |
| <b>Systolic BP (mmHg)</b>                              | 123.3±16.8          | 126.4±18.8          | 129.2±19             |
| <b>Diastolic BP (mmHg)</b>                             | 77.2±10.9           | 81.7±10.5           | 82±10.5              |
| <b>Daily smoker No. (%)</b>                            | 1768 (46.7)         | 1417 (48.9)         | 937 (36.7)           |
| <b>Diabetes No. (%)</b>                                | 86 (2.3)            | 92 (3.1)            | 89 (3.5)             |
| <b>eGFR (mL/min for 1.73m<sup>2</sup>)</b>             | 110.1 (97.0, 121.5) | 104.7 (93.1, 114.3) | 98.0 (86.1, 108.0)   |
| <b>eGFR&lt;60 mL/min for 1.73m<sup>2</sup> No. (%)</b> | 76 (2)              | 41 (1.5)            | 65 (2.6)             |
| <b>Creatinine (mg/dL)</b>                              | 0.8 (0.7, 0.9)      | 0.8 (0.7, 0.9)      | 0.85 (0.8, 1.0)      |
| <b>Cystatin C (mg/L)</b>                               | 0.7 (0.6, 0.8)      | 0.73 (0.6, 0.8)     | 0.77 (0.7, 0.9)      |
| <b>CRP (mg/L)</b>                                      | 1.2 (0.6, 2.81)     | 1.2 (0.5, 2.7)      | 1.45 (0.7, 3.3)      |
| <b>GDF-15 (pg/mL)</b>                                  | 456 (342.0, 625.7)  | 480 (365.2, 642.1)  | 551.7 (419.0, 739.9) |

Baseline characteristics are given as absolute and relative frequencies for categorical variables, mean ± standard deviation (mean±standard deviation) or quartiles (median (25<sup>th</sup> percentile, 75<sup>th</sup> percentile) for continuous variables. The baseline survey was carried in 1982-84 (round 1). The cohort was re-examined in 1987-1988 (round 2) and 1993-1994 (round 3). BMI= body mass index, HDL=high-density lipoprotein, LDL=low-density lipoprotein, BP=blood pressure, eGFR= estimated glomerular infiltration rate, CRP= C-reactive protein, GDF-15=Growth differentiation factor-15.
