# Supplementary material for: Predictive value of long-term changes of growth differentiation factor-15 over a 27-year-period for heart failure and death due to coronary heart disease
Source: PubMed Central journal article supplement (PMC5957420; doi:10.1371/journal.pone.0197497), 2018-05-17
Supplement: pone.0197497.s003.pdf [file pone.0197497.s003.pdf]

**S2 Table. C-Indices for 5-year prediction of death from CHD and HF**

| <b>Death from CHD</b> | <b>C-index (95% CI)</b> | <b>C-index differences (95% CI)</b> | <b>p-value</b> |
|-----------------------|-------------------------|-------------------------------------|----------------|
| Base model            | 0.750 (0.646, 0.854)    | -                                   | -              |
| GDF-15 model          | 0.791 (0.687, 0.895)    | 0.04076 (0.00814, 0.07338)          | 0.014          |
| CRP model             | 0.759 (0.655, 0.864)    | 0.00911 (-0.01310, 0.03131)         | 0.42           |
| CYSTATIN C model      | 0.762 (0.657, 0.867)    | 0.01152 (-0.01532, 0.03835)         | 0.40           |
| <b>HF</b>             |                         |                                     |                |
| Base model            | 0.783 (0.669, 0.898)    | -                                   | -              |
| GDF-15 model          | 0.800 (0.686, 0.914)    | 0.01691 (0.00254, 0.03129)          | 0.021          |
| CRP model             | 0.816 (0.702, 0.930)    | 0.03252 (-0.00065, 0.06569)         | 0.055          |
| CYSTATIN C model      | 0.801 (0.687, 0.915)    | 0.01768 (-0.01328, 0.04863)         | 0.26           |

The 5-year predicted probabilities are based on Cox models. The base model is based on the following predictors: age, sex, overweight (BMI > 25 kg/m<sup>2</sup>), systolic blood pressure, diabetes, daily smoker, renal insufficiency (eGFR > 60 ml/min or 1,73m<sup>3</sup>). The biomarkers are added to the base model. The follow-up time begins at round 1 and only the first 5 years of follow-up were used. Only round 1 measurements are used. 31 deaths from CHD and 25 HF cases were observed during the 5 years' follow-up used.
