# Supplementary material for: Predictive value of long-term changes of growth differentiation factor-15 over a 27-year-period for heart failure and death due to coronary heart disease
Source: PubMed Central journal article supplement (PMC5957420; doi:10.1371/journal.pone.0197497), 2018-05-17
Supplement: pone.0197497.s004.pdf [file pone.0197497.s004.pdf]

**S3 Table. C-Indices for 10-year prediction of death from CHD and HF**

| <b>Death from CHD</b> | <b>C-index (95% CI)</b> | <b>C-index differences (95% CI)</b> | <b>p-value</b> |
|-----------------------|-------------------------|-------------------------------------|----------------|
| Base model            | 0.826 (0.761, 0.891)    | -                                   | -              |
| GDF-15 model          | 0.848 (0.782, 0.913)    | 0.02131 (0.00573, 0.03689)          | 0.0074         |
| CRP model             | 0.827 (0.762, 0.892)    | 0.00083 (-0.00553, 0.00720)         | 0.80           |
| CYSTATIN C model      | 0.832 (0.767, 0.897)    | 0.00536 (-0.00651, 0.01723)         | 0.38           |
| <b>HF</b>             |                         |                                     |                |
| Base model            | 0.831 (0.759, 0.903)    | -                                   | -              |
| GDF-15 model          | 0.840 (0.768, 0.912)    | 0.00897 (-0.00235, 0.02029)         | 0.12           |
| CRP model             | 0.855 (0.783, 0.928)    | 0.02399 (0.00682, 0.04116)          | 0.0062         |
| CYSTATIN C model      | 0.838 (0.766, 0.910)    | 0.00658 (-0.00830, 0.02146)         | 0.39           |

The 10-year predicted probabilities are based on Cox models. The base model is based on the following predictors: age, sex, overweight (BMI > 25 kg/m<sup>2</sup>), systolic blood pressure, diabetes, daily smoker, renal insufficiency (eGFR > 60 ml/min or 1,73m<sup>3</sup>). The biomarkers are added to the base model. The follow-up time begins at round 1 and only the first 10 years of follow-up were used. Only round 1 measurements are used. 77 deaths from CHD and 62 HF cases were observed during the 10 years' follow-up used.
